# Supplementary material for: Multimodal digital phenotyping of diet, physical activity, and glycemia in Hispanic/Latino adults with or at risk of type 2 diabetes
Source: PubMed Central journal article supplement (PMC10784546; doi:10.1038/s41746-023-00985-7), 2024-01-11
Supplement: 41746_2023_985_MOESM1_ESM.pdf [file 41746_2023_985_MOESM1_ESM.pdf]

## Supplementary Material

**Supplementary Table 1:** Annotation details.

| Annotator | Number of logs for which corrected timing was identified | Number of manual timings added |
|-----------|----------------------------------------------------------|--------------------------------|
| 1         | 1154                                                     | 601                            |
| 2         | 1078                                                     | 630                            |
| 3         | 1064                                                     | 444                            |
| 4         | 1356                                                     | 398                            |

**Supplementary Table 2:** Covariate balance achieved between elevated meal event count and covariates after inverse probability weighting.

| Balance measures between elevated meal event count and covariates | Type of Variable | Maximum standardized mean difference across all pairwise comparisons |                                     |
|-------------------------------------------------------------------|------------------|----------------------------------------------------------------------|-------------------------------------|
|                                                                   |                  | Before inverse probability weighting                                 | After inverse probability weighting |
| Baseline glucose                                                  | Continuous       | 0.57                                                                 | 0.41                                |
| Step counts                                                       | Continuous       | 0.32                                                                 | 0.25                                |
| Duration                                                          | Continuous       | 0.39                                                                 | 0.11                                |

**Supplementary Table 3:** Output of linear mixed effects model to estimate effect of elevated meal event count on time-in-range (54-140 mg/dL).

|                           |               | Estimate | Standard Error | P-value (t-test) |
|---------------------------|---------------|----------|----------------|------------------|
| Intercept                 |               | 99.4     | 6.7            | <0.0001          |
| Elevated meal event count | 0 to 1        | -1.1     | 1.3            | 0.41             |
|                           | 0 to 2        | -4.0     | 1.3            | 0.003            |
|                           | 0 to $\geq 3$ | -8.1     | 1.5            | <0.0001          |

|                   |      |      |         |
|-------------------|------|------|---------|
| Daily step counts | -0.2 | 0.2  | 0.30    |
| Baseline glucose  | -0.3 | 0.02 | <0.0001 |
| Duration          | 0.6  | 0.3  | 0.03    |

**Supplementary Table 4:** Output of linear mixed effects model to estimate effect of elevated meal event count on average glucose.

|                           |               | Estimate | Standard Error | P-value (t-test) |
|---------------------------|---------------|----------|----------------|------------------|
| Intercept                 |               | 92.5     | 7.6            | <0.0001          |
| Elevated meal event count | 0 to 1        | 1.7      | 1.2            | 0.16             |
|                           | 0 to 2        | 5.8      | 1.3            | <0.0001          |
|                           | 0 to $\geq 3$ | 7.7      | 1.4            | <0.0001          |
| Step counts               |               | -0.3     | 0.2            | 0.08             |
| Baseline glucose          |               | 0.3      | 0.02           | <0.0001          |
| Duration                  |               | -0.5     | 0.3            | 0.05             |

**Supplementary Table 5:** Covariate balance achieved between daily step counts and covariates after inverse probability weighting.

| Balance measures between step counts and covariates |   | Type of Variable | Correlation                          |                                     |
|-----------------------------------------------------|---|------------------|--------------------------------------|-------------------------------------|
|                                                     |   |                  | Before inverse probability weighting | After inverse probability weighting |
| Baseline glucose                                    |   | Continuous       | -0.19                                | -0.18                               |
| Elevated meal event count                           | 0 | Binary           | 0.08                                 | 0.03                                |
|                                                     | 1 | Binary           | -0.08                                | -0.05                               |

|          |   |            |       |      |
|----------|---|------------|-------|------|
|          | 2 | Binary     | 0.02  | 0.03 |
|          | 3 | Binary     | -0.02 | -0.0 |
| Duration |   | Continuous | 0.15  | 0.09 |

**Supplementary Table 6:** Output of linear mixed effects model to estimate effect of daily step count on time-in-range (54-140 mg/dL).

| Fixed effects             |               | Estimate | Standard Error | P-value (t-test) |
|---------------------------|---------------|----------|----------------|------------------|
| Intercept                 |               | 100.0    | 6.5            | <0.0001          |
| Step counts               |               | 0.07     | 0.1            | 0.63             |
| Elevated meal event count | 0 to 1        | -1.3     | 1.5            | 0.40             |
|                           | 0 to 2        | -3.8     | 1.5            | 0.01             |
|                           | 0 to $\geq 3$ | -7.7     | 1.9            | <0.0001          |
| Baseline glucose          |               | -0.3     | 0.02           | <0.0001          |
| Duration                  |               | 0.4      | 0.3            | 0.13             |

**Supplementary Table 7:** Output of linear mixed effects model to estimate effect of daily step count on average glucose.

| Fixed effects             |        | Estimate | Standard Error | P-value (t-test) |
|---------------------------|--------|----------|----------------|------------------|
| Intercept                 |        | 91.8     | 7.8            | <0.0001          |
| Step counts               |        | -0.3     | 0.1            | 0.02             |
| Elevated meal event count | 0 to 1 | 2.5      | 1.4            | 0.08             |
|                           | 0 to 2 | 5.7      | 1.4            | <0.0001          |

|                  |               |      |      |         |
|------------------|---------------|------|------|---------|
|                  | 0 to $\geq 3$ | 7.6  | 1.7  | <0.0001 |
| Baseline glucose |               | 0.3  | 0.02 | <0.0001 |
| Duration         |               | -0.4 | 0.2  | 0.09    |

**Supplementary Table 8:** Output of linear mixed effects model to estimate effect of post-meal step count on meal event glucose response.

| Fixed effects        | Estimate | Standard Error | P-value (t-test) |
|----------------------|----------|----------------|------------------|
| Intercept            | 4755.0   | 436.1          | <0.0001          |
| Post-meal step count | -640.6   | 185.4          | 0.0006           |
| Calorie content      | 182.8    | 33.0           | <0.0001          |

**Supplementary Table 9:** Output of linear mixed effects model to estimate effect of post-meal step count on elevated classification of meal event.

| Fixed effects        | Estimate | Standard Error | P-value (t-test) |
|----------------------|----------|----------------|------------------|
| Intercept            | -0.2     | 0.2            | 0.43             |
| Post-meal step count | -0.8     | 0.2            | <0.0001          |
| Calorie content      | 0.08     | 0.03           | 0.002            |

**Supplementary Table 10:** Occupation information of the participants.

| Occupation | Number of participants |
|------------|------------------------|
| Promoter   | 3                      |
| Counselor  | 1                      |

|                                       |   |
|---------------------------------------|---|
| Substitute teacher                    | 1 |
| Retired                               | 2 |
| Student                               | 1 |
| Deli                                  | 1 |
| Records technician                    | 1 |
| Cleaning service                      | 1 |
| Housewife                             | 2 |
| Gardener                              | 1 |
| Service Counter Representative (Bank) | 1 |
| Housekeeping                          | 9 |
| Housemaid                             | 1 |
| Nurse                                 | 1 |
| Housewife/student                     | 1 |
| Customer service                      | 1 |
| Cook                                  | 2 |
| Cashier                               | 1 |
| None                                  | 1 |
| Guest representative                  | 1 |
| Clerk                                 | 1 |
| Engineer                              | 1 |
| Full service                          | 1 |

**Supplementary Table 11:** Main results obtained with quadratic term fit between average meal event glucose response and HbA1c. Effect of daily step count and elevated meal event count on time-in-range (54-140 mg/dL) and average glucose. Effect of post-meal step count and calorie content on meal event glucose response and elevated classification of meal event.

| Outcome                   |        | Time-in-range<br>(54-140 mg/dL)<br>Percentage of total time (%) |                |                  | Average glucose<br>mg/dL |                |                  |
|---------------------------|--------|-----------------------------------------------------------------|----------------|------------------|--------------------------|----------------|------------------|
|                           |        | Estimate                                                        | Standard Error | P-value (t-test) | Estimate                 | Standard Error | P-value (t-test) |
| Elevated meal event count | 0 to 1 | -0.4                                                            | 1.3            | 0.7              | 1.4                      | 1.2            | 0.26             |
|                           | 0 to 2 | -4.0                                                            | 1.3            | 0.003            | 5.8                      | 1.3            | <0.0001          |

|                                               |               |                             |                |                  |                                       |                |                  |
|-----------------------------------------------|---------------|-----------------------------|----------------|------------------|---------------------------------------|----------------|------------------|
|                                               | 0 to $\geq 3$ | -6.9                        | 1.5            | <0.0001          | 7.3                                   | 1.5            | <0.0001          |
| Daily step count<br>(1 unit = 1000 steps)     |               | 0.08                        | 0.2            | 0.58             | -0.4                                  | 0.1            | 0.009            |
| Outcome                                       |               | Meal event glucose response |                |                  | Elevated classification of meal event |                |                  |
| Variable of interest                          |               | Estimate                    | Standard Error | P-value (t-test) | Estimate                              | Standard Error | P-value (t-test) |
| Post-meal step count<br>(1 unit = 1000 steps) |               | -640.0                      | 185.4          | 0.0006           | -0.8                                  | 0.2            | <0.0001          |
| Calorie content<br>(1 unit = 100 kcal)        |               | 182                         | 34.0           | <0.0001          | 0.1                                   | 0.03           | 0.0005           |

**Supplementary Table 12:** Effect of elevated meal event count on time-in-range (70-140 mg/dL).

|                           |               |                                                                 |                |                  |
|---------------------------|---------------|-----------------------------------------------------------------|----------------|------------------|
| Outcome                   |               | Time-in-range<br>(70-140 mg/dL)<br>Percentage of total time (%) |                |                  |
| Variable of interest      |               | Estimate                                                        | Standard Error | P-value (t-test) |
| Elevated meal event count | 0 to 1        | -1.4                                                            | 1.4            | 0.35             |
|                           | 0 to 2        | -4.4                                                            | 1.5            | 0.003            |
|                           | 0 to $\geq 3$ | -8.4                                                            | 1.6            | <0.0001          |

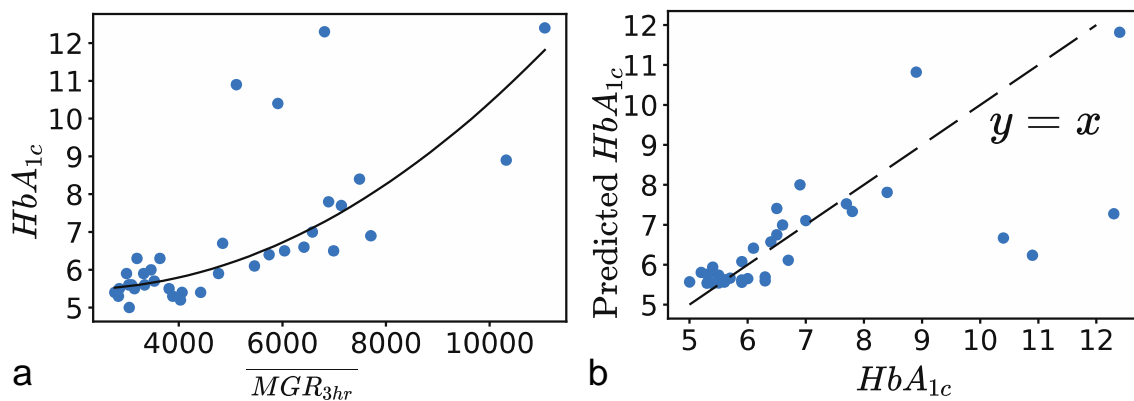

**Supplementary Figure 1:** Quadratic term mapping between average meal event glucose response and HbA<sub>1c</sub>. The scatterplot (a) displays the robust regression fit between average meal event glucose response and HbA<sub>1c</sub>. The

equation representing the best line-of-fit is reported (solid black line). The scatterplot in (b) shows the correlation between true and fitted HbA<sub>1c</sub> values. The dashed black line represents the 45-degree line.
